# Supplementary material
Source: MDPI journal article supplement (https://www.mdpi.com/2073-4352/13/10/1490)
Supplement: s1 [file s1]

## **A luminescent MOF based on pyrimidine-4,6-dicarboxylate ligand and lead(II) with unprecedented topology**

Laura Razquin-Bobillo †, <sup>1</sup> Oier Pajuelo-Corral †, <sup>1</sup> Andoni Zabala-Lekuona, <sup>1</sup> Iñigo Vitorica-Yrezabal, <sup>2</sup> Jose Angel García, <sup>3</sup> Jose M. Moreno, <sup>2</sup> Antonio Rodríguez-Diéguez <sup>2</sup> and Javier Cepeda <sup>1,\*</sup>

*1 Departamento de Química Aplicada, Facultad de Química, Universidad del País Vasco/Euskal Herriko Unibertsitatea (UPV/EHU), 20018, Donostia, Spain.*

*2 Departamento de Química Inorgánica, Facultad de Ciencias, Universidad de Granada, 18071, Granada, Spain.*

*3 Departamento de Física, Facultad de Ciencia y Tecnología, Universidad del País Vasco/Euskal Herriko Unibertsitatea (UPV/EHU), 48940, Leioa, Spain.*

† These authors contributed equally to this work.

### Contents:

- S1. Structural details.
- S2. Continuous Shape Measurements (CShMs).
- S3. Powder X-ray Diffraction Analysis.
- S4. FT-IR spectroscopy.
- S5. Photoluminescence measurements and calculations.

**S1. Additional structural details.**

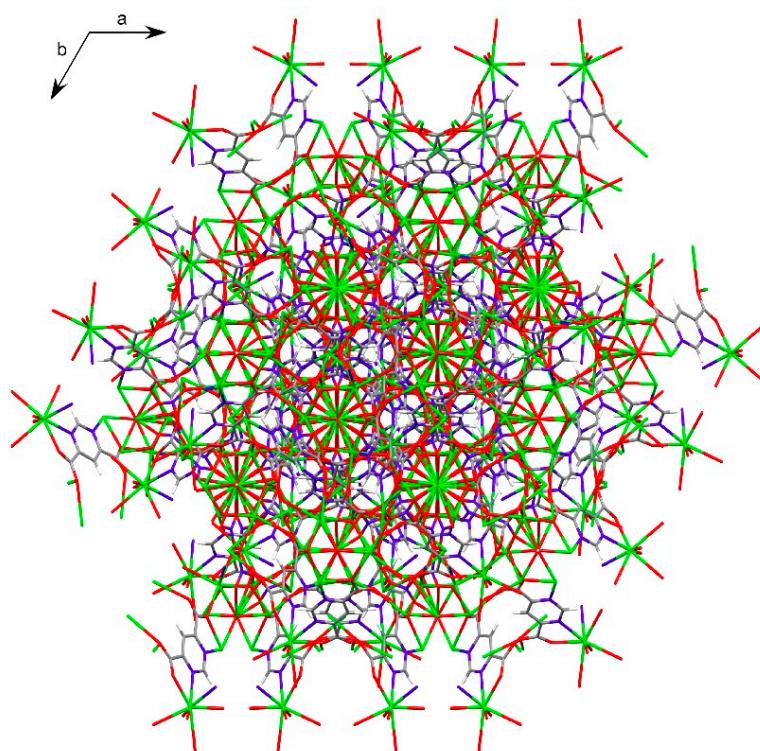

**Figure S1.** Packing of compound **1** along the *c* axis viewing direction.

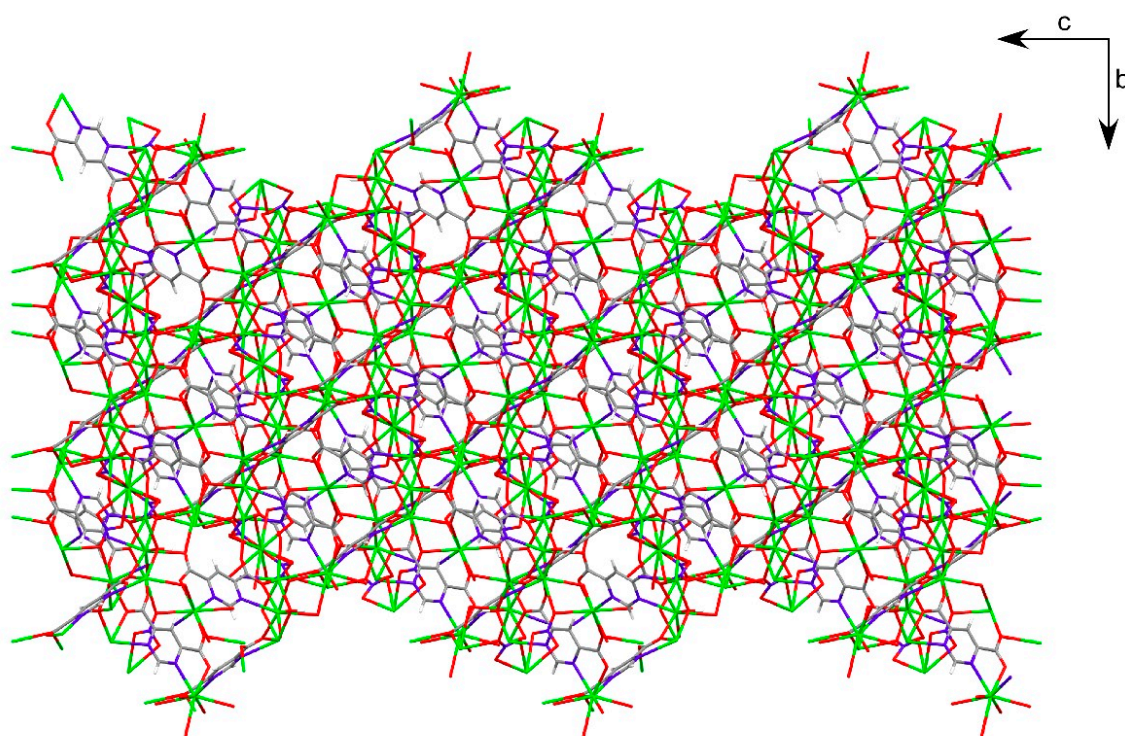

**Figure S2.** Packing of compound **1** along the *a* axis viewing direction.

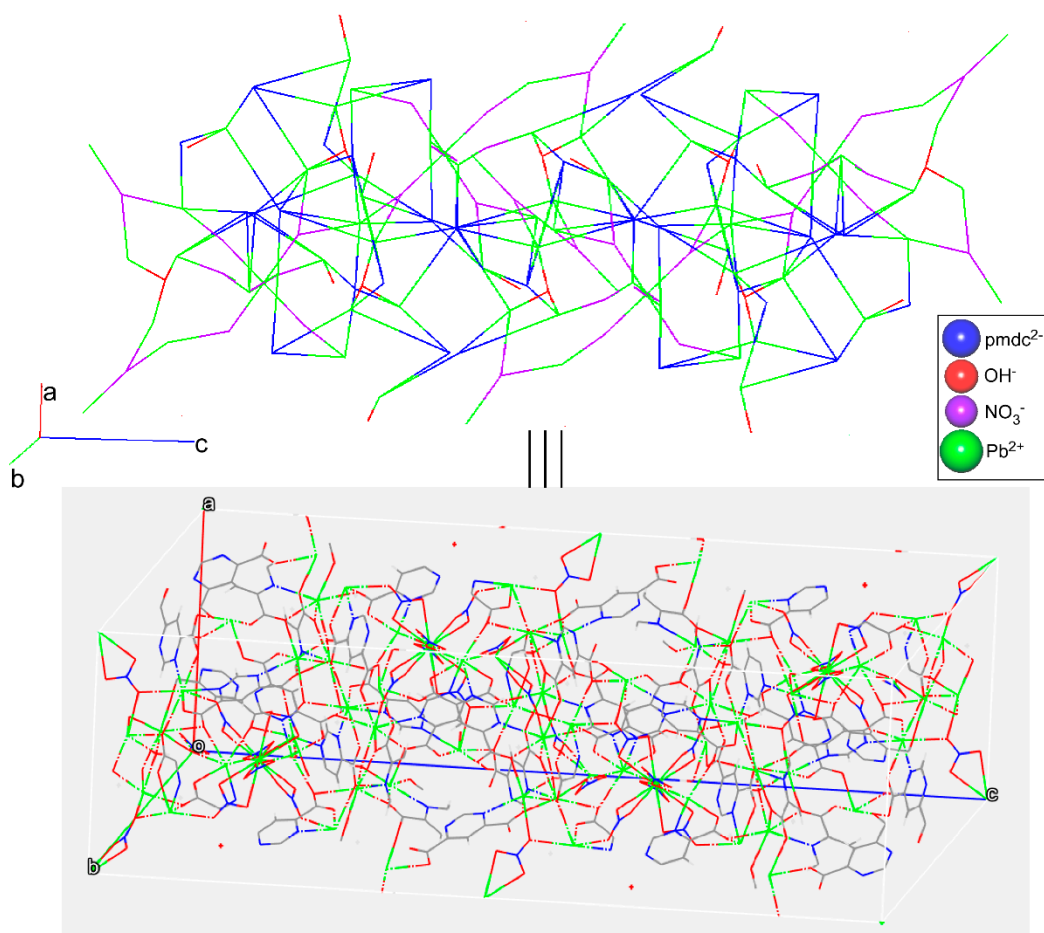

**Figure S3.** Crystal packing of compound **1** drawn in the form of topological network (top) and molecular framework (bottom).

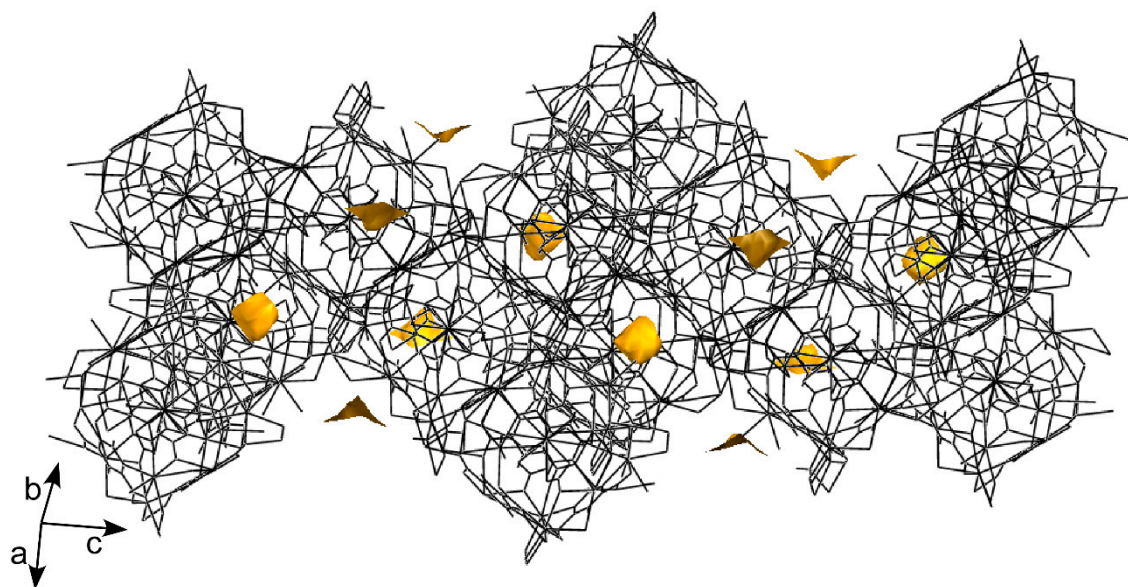

**Figure S4.** Crystal packing of compound **1** showing the isolated voids (golden solid) containing water molecules.

## S2. Continuous Shape Measurements (CShMs).

**Table S1.** Continuous shape measurements for the coordination environments for compound **1**.

The lowest SHAPE values are shown in bold blue, indicating best fits.

### Codes:

|         |                   |                                         |
|---------|-------------------|-----------------------------------------|
| HP-7    | 1 D <sub>7h</sub> | Heptagon                                |
| HPY-7   | 2 C <sub>6v</sub> | Hexagonal pyramid                       |
| PBPY-7  | 3 D <sub>5h</sub> | Pentagonal bipyramid                    |
| COC-7   | 4 C <sub>3v</sub> | Capped octahedron                       |
| CTPR-7  | 5 C <sub>2v</sub> | Capped trigonal prism                   |
| JPBPY-7 | 6 D <sub>5h</sub> | Johnson pentagonal bipyramid J13        |
| JETPY-7 | 7 C <sub>3v</sub> | Johnson elongated triangular pyramid J7 |

| Structure [ML7] | HP-7   | HPY-7  | PBPY-7 | COC-7 | CTPR-7       | JPBPY-7 | JETPY-7 |
|-----------------|--------|--------|--------|-------|--------------|---------|---------|
| <b>Pb1</b>      | 32.503 | 19.509 | 5.861  | 2.872 | <b>2.159</b> | 9.258   | 20.855  |

### Codes:

|          |                    |                                            |
|----------|--------------------|--------------------------------------------|
| OP-8     | 1 D <sub>8h</sub>  | Octagon                                    |
| HPY-8    | 2 C <sub>7v</sub>  | Heptagonal pyramid                         |
| HBPY-8   | 3 D <sub>6h</sub>  | Hexagonal bipyramid                        |
| CU-8     | 4 O <sub>h</sub>   | Cube                                       |
| SAPR-8   | 5 D <sub>4d</sub>  | Square antiprism                           |
| TDD-8    | 6 D <sub>2d</sub>  | Triangular dodecahedron                    |
| JGBF-8   | 7 D <sub>2d</sub>  | Johnson gyrobifastigium J26                |
| JETBPY-8 | 8 D <sub>3h</sub>  | Johnson elongated triangular bipyramid J14 |
| JBTPR-8  | 9 C <sub>2v</sub>  | Biaugmented trigonal prism J50             |
| BTTPR-8  | 10 C <sub>2v</sub> | Biaugmented trigonal prism                 |
| JSD-8    | 11 D <sub>2d</sub> | Snub diphennoid J84                        |
| TT-8     | 12 T <sub>d</sub>  | Triakis tetrahedron                        |
| ETBPY-8  | 13 D <sub>3h</sub> | Elongated trigonal bipyramid               |

| Structure [ML8] | OP-8   | HPY-8  | HBPY-8 | CU-8   | SAPR-8 | TDD-8 | JGBF-8 |
|-----------------|--------|--------|--------|--------|--------|-------|--------|
| <b>Pb2</b>      | 27.041 | 24.070 | 16.303 | 10.258 | 1.768  | 3.401 | 13.684 |

| Structure [ML8] | JETBPY-8 | JBTPR-8 | BTPR-8 | JSD-8 | TT-8   | ETBPY-8 |
|-----------------|----------|---------|--------|-------|--------|---------|
| <b>Pb2</b>      | 24.012   | 3.876   | 3.624  | 5.445 | 10.587 | 19.375  |

**Codes:**

|           |                    |                                            |
|-----------|--------------------|--------------------------------------------|
| DP-12     | 1 D <sub>12h</sub> | Dodecagon                                  |
| HPY-12    | 2 C <sub>11v</sub> | Hendecagonal pyramid                       |
| DBPY-12   | 3 D <sub>10h</sub> | Decagonal bipyramid                        |
| HPR-12    | 4 D <sub>6h</sub>  | Hexagonal prism                            |
| HAPR-12   | 5 D <sub>6d</sub>  | Hexagonal antiprism                        |
| TT-12     | 6 T <sub>d</sub>   | Truncated tetrahedron                      |
| COC-12    | 7 O <sub>h</sub>   | Cuboctahedron                              |
| ACOC-12   | 8 D <sub>3h</sub>  | Anticuboctahedron J27                      |
| IC-12     | 9 I <sub>h</sub>   | Icosahedron                                |
| JSC-12    | 10 C <sub>4v</sub> | Johnson square cupola J4                   |
| JEPBPY-12 | 11 D <sub>6h</sub> | Johnson elongated pentagonal bipyramid J16 |
| JBAPPR-12 | 12 C <sub>2v</sub> | Biaugmented pentagonal prism J53           |
| JSPMC-12  | 13 C <sub>s</sub>  | Sphenomegacorona J88                       |

| Structure [ML12] | DP-12  | HPY-12 | DBPY-12 | HPR-12 | HAPR-12 | TT-12  | COC-12 |
|------------------|--------|--------|---------|--------|---------|--------|--------|
| <b>Pb3</b>       | 31.836 | 28.687 | 19.525  | 10.661 | 17.152  | 11.788 | 1.830  |

| Structure [ML12] | ACOC-12 | IC-12 | JSC-12 | JEPBPY-12 | JBAPPR-12 | JSPMC-12 |
|------------------|---------|-------|--------|-----------|-----------|----------|
| <b>Pb3</b>       | 7.325   | 5.604 | 20.646 | 11.573    | 12.422    | 19.913   |

### S3. Powder X-ray Diffraction Analysis.

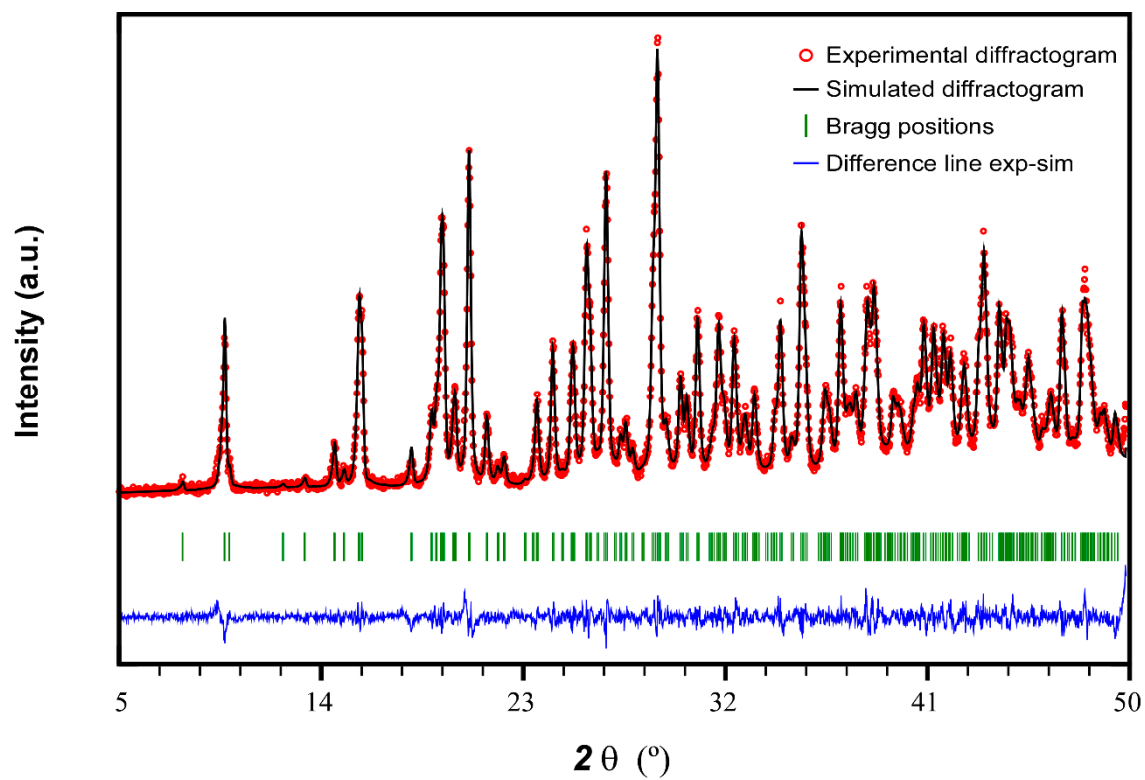

**Figure S5.** Pattern-matching analysis of polycrystalline sample of compound **1**.



#### S4. FT-IR spectroscopy.

Infrared spectroscopy was used as an initial characterization technique to check the presence of pmdc in compound **1** (Figure S4). Table S2 shows the wavenumbers of the most relevant bands, together with their relative intensities and the proposed assignment in each case for compound **1**.

The spectrum of compound **1** shows a broad and intense band in the frequency region of 3550-3100  $\text{cm}^{-1}$ , assigned to the characteristic peaks of the OH vibration of free water molecules and to the C-H vibration of the pyrimidinic ring of the pmdc ligand. The intense vibrations around 1650  $\text{cm}^{-1}$  and 1360  $\text{cm}^{-1}$  correspond to the asymmetric and symmetric stretching vibrations of the carboxylate groups. At 1385  $\text{cm}^{-1}$  the strong vibration of the nitrate anion appears, while in the 1300-1000  $\text{cm}^{-1}$  region several medium- and weak-intensity peaks appear that can be attributed to the distortions originated in the aromatic ring of pmdc ligand. The vibration bands of the M-O and M-N bonds are observed below 550  $\text{cm}^{-1}$ .

**Table S2.** Main IR absorption bands ( $\text{cm}^{-1}$ ) for compound **1**.<sup>a</sup>

| Asig. <sup>b</sup>                                              | Compound <b>1</b>                 |
|-----------------------------------------------------------------|-----------------------------------|
| $\nu$ (O–H)                                                     | 3470m, 3170m                      |
| $\nu$ (C–H)                                                     | 3075m                             |
| $\nu_{\text{as}}(\text{O–C–O}) + \nu (\text{C=C} + \text{C=N})$ | 1635s, 1600s, 1585sh, 1535s       |
| $\nu (\text{C}_{\text{ar}}\text{–C})$                           | 1460w                             |
| $\nu_{\text{s}} (\text{O–C–O})$                                 | 1360s, 1305w                      |
| $\nu (\text{NO}_3)$                                             | 1385s                             |
| $\delta_{\text{ip}}(\text{C–H})$                                | 1285m, 1185m, 1095w, 1040w, 1015m |
| $\delta_{\text{op}}(\text{C–H})$                                | 940w                              |
| $\delta_{\text{ring}}$                                          | 835m                              |
| $\delta_{\text{ip}}(\text{O–C–O})$                              | 810m                              |
| $\delta_{\text{op}}(\text{O–C–O})$                              | 730s, 715ss                       |
| $\tau_{\text{ring}}$                                            | 695m, 670m, 560w                  |
| $\nu (\text{M–O} + \text{M–N})$                                 | 505w, 485w, 445w, 415w            |

<sup>a</sup> vs: very strong, s: strong, m: medium, w: weak, and sh: shoulder. <sup>b</sup>  $\nu$ : stretching,  $\delta$ : bending, ip: inside plane, op: out of plane, s: symmetric, and as: antisymmetric.

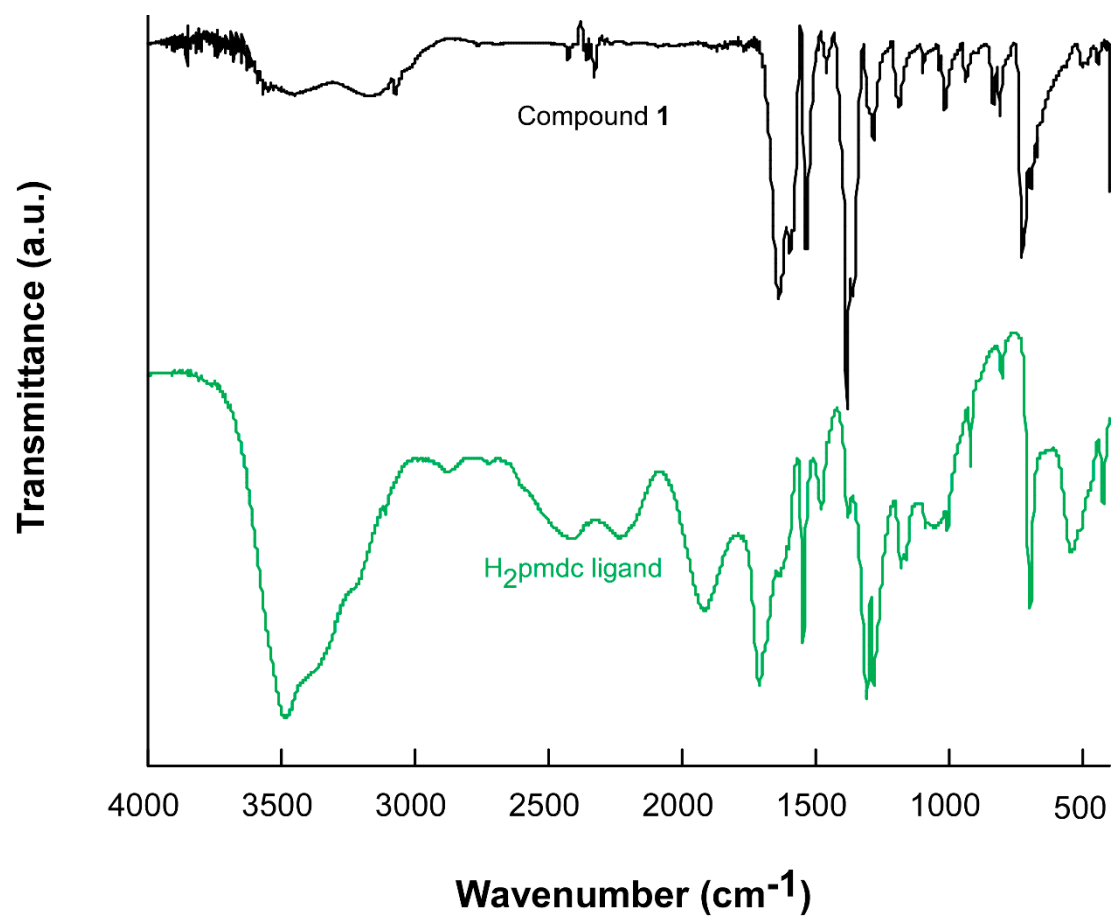

**Figure S6.** Comparison of the FTIR spectra of compound **1** and the free H<sub>2</sub>pmdc ligand.



## S5. Photoluminescence measurements and calculations.

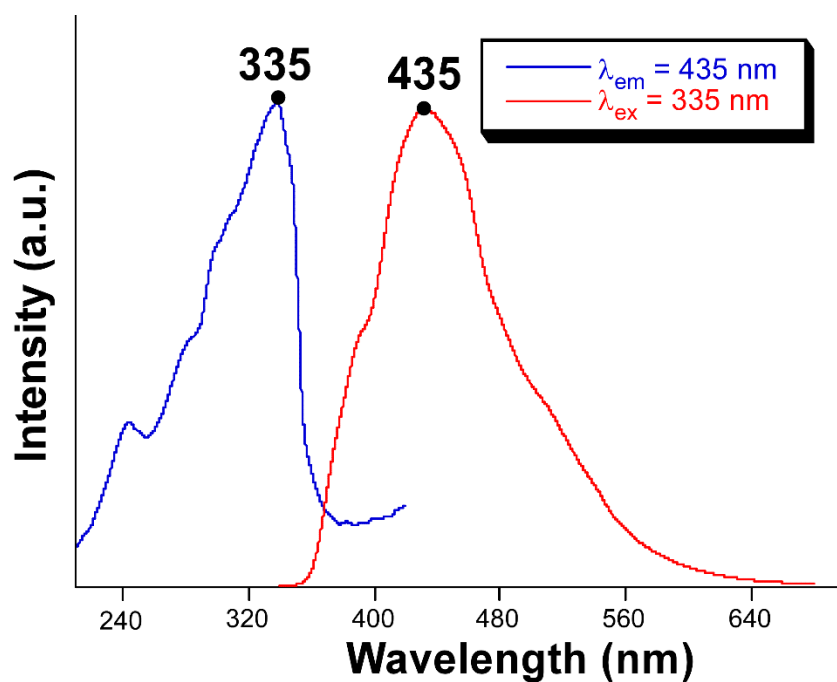

**Figure S7.** Excitation ( $\lambda_{\text{em}} = 435 \text{ nm}$ ) and emission ( $\lambda_{\text{ex}} = 335 \text{ nm}$ ) spectra of the H2pmdc ligand recorded at room temperature.

The emission lifetimes were estimated by measuring the decay curves for both maxima. The signal for the first maximum was so weak and the lifetime quite short so it was estimated by deconvolution. On the contrary, the lifetime of the maximum at 550 nm was estimated by a tail fitting procedure and gave a component of 5.71(59)  $\mu\text{s}$  with a weight of 40% and a second component of 116.4(34)  $\mu\text{s}$  with a weight of 60%.

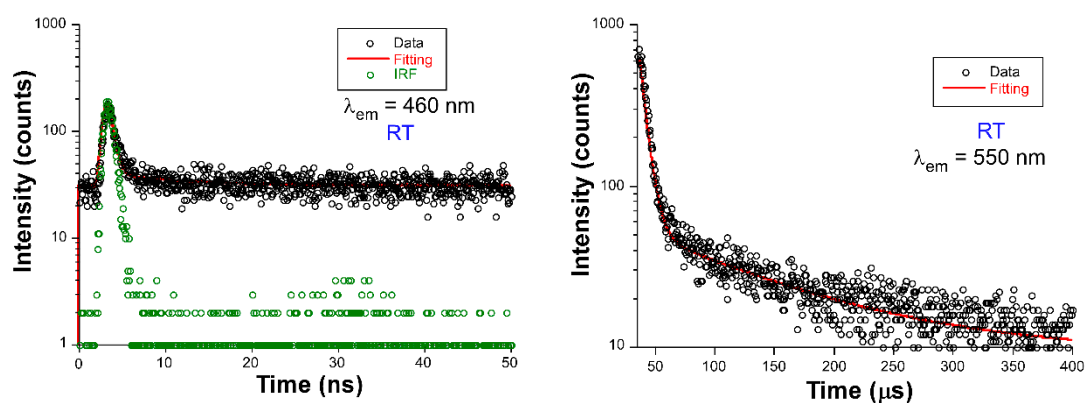

**Figure S8.** Decay curves of the emission of compound **1** at room temperature for the main emission maxima.

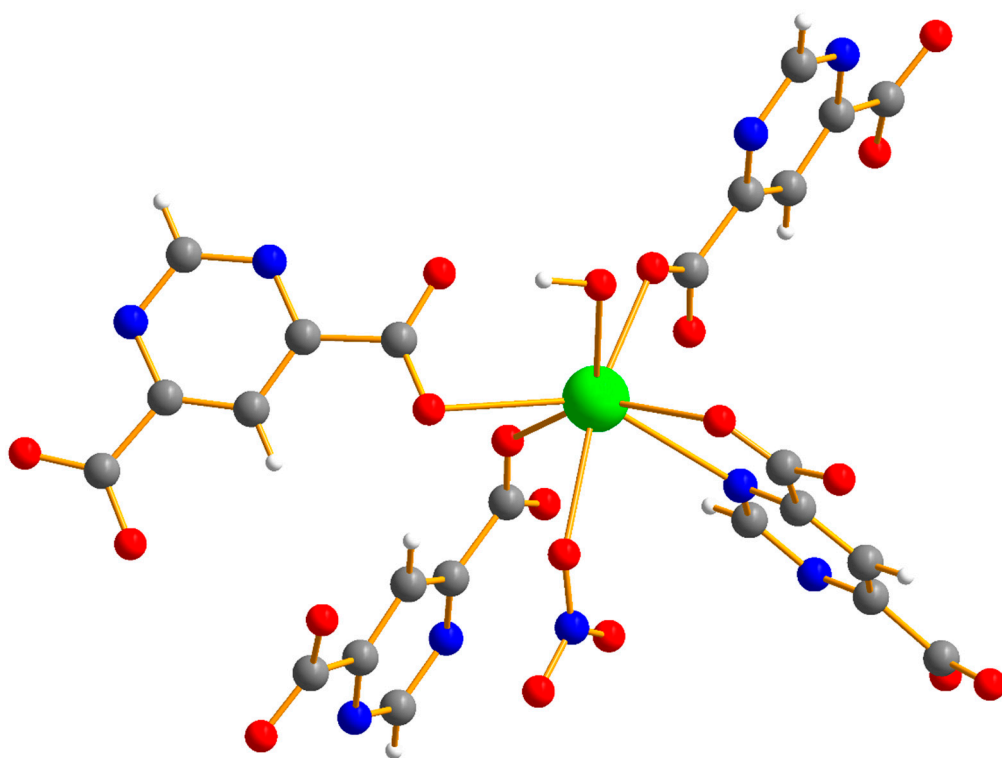

**Figure S9.** Monomeric model taken from the X-ray coordinates used for the calculations of the PL properties of compound **1**.

**Table S3.** Calculated main excitation and emission energies (nm), singlet electronic transitions, and associated oscillator strengths of a model of compound **1** in gas phase.

| Exc. state          | Calcd. $\lambda$ (nm) | Significant contributions         | Osc. strength (a.u.) |
|---------------------|-----------------------|-----------------------------------|----------------------|
| Excitation energies |                       |                                   |                      |
| 7                   | 395                   | HOMO – 5 $\rightarrow$ LUMO (99%) | 0.1421               |
| 10                  | 335                   | HOMO – 7 $\rightarrow$ LUMO (99%) | 0.0356               |

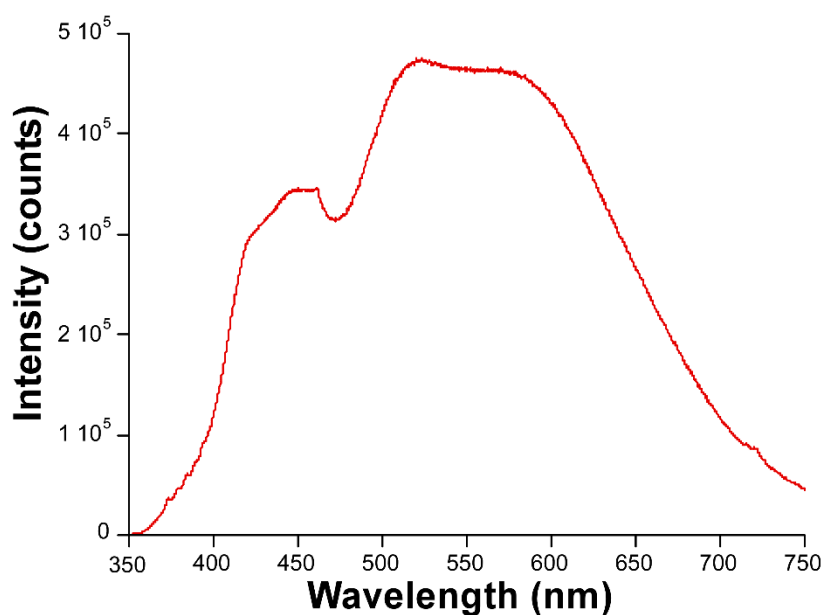

**Figure S10.** Emission spectrum of compound **1** collected at 15 K under monochromatic laser light ( $\lambda_{\text{ex}} = 325$  nm).

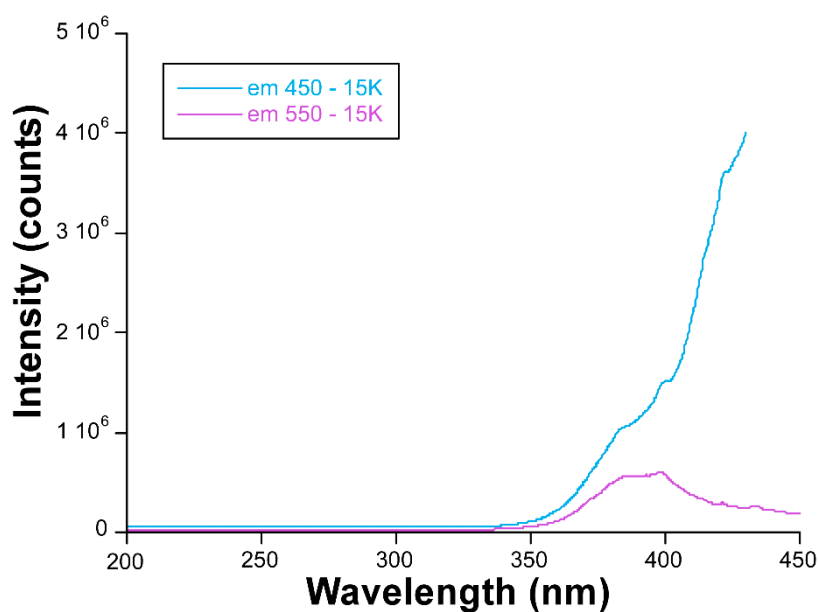

**Figure S11.** Comparison of the low temperature excitation spectra collected over the two maxima observed in the emission of compound **1**.

The emission lifetimes for the low temperature decay curves were estimated with the same fitting procedure explained for RT measurements by measuring the decay curves for both maxima. The signal for the first maximum was so weak and the lifetime quite short so it was estimated by deconvolution. On the contrary, the lifetime of the maximum at 550 nm was estimated by a tail fitting procedure and gave a component of 5.71(59)  $\mu\text{s}$  with a weight of 40% and a second component of 116.4(34)  $\mu\text{s}$  with a weight of 60%.

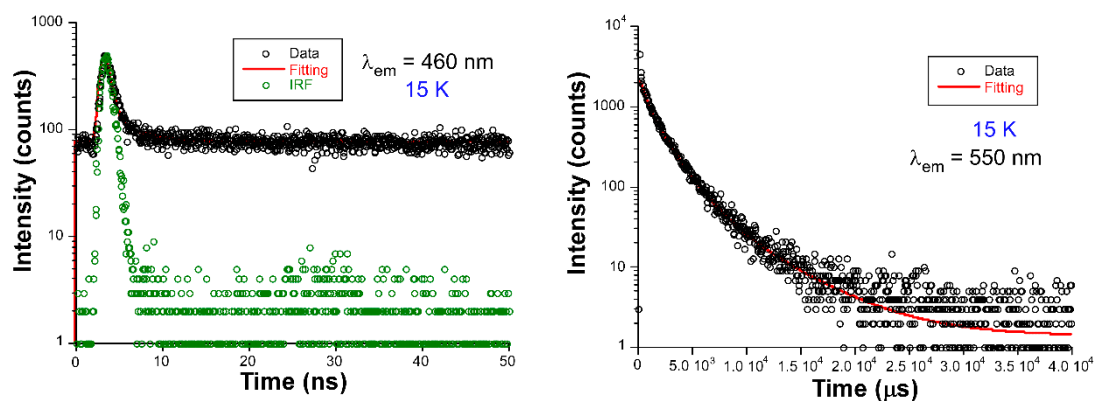

**Figure S12.** Decay curves of the emission of compound **1** at low temperature for the main emission maxima.

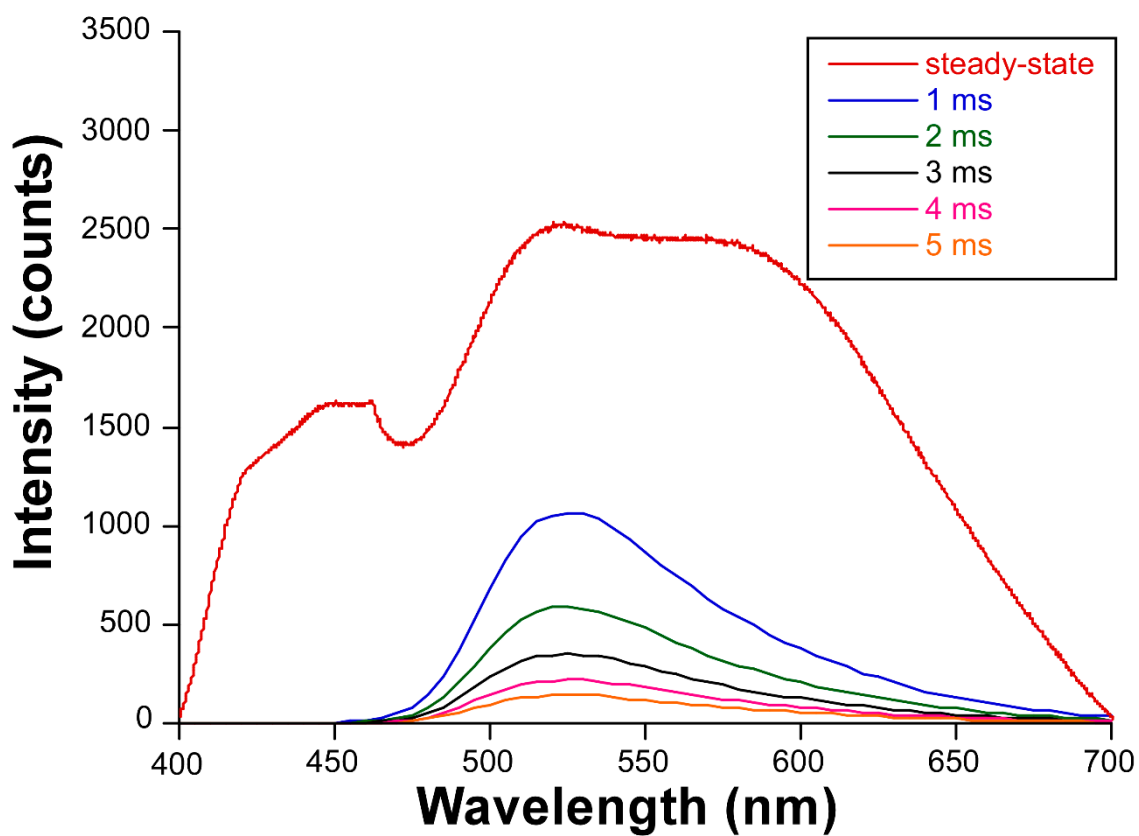

**Figure S13.** TRES recorded at 15 K for compound **1** showing a selection of spectra.

**S6. Diffuse reflectance.**

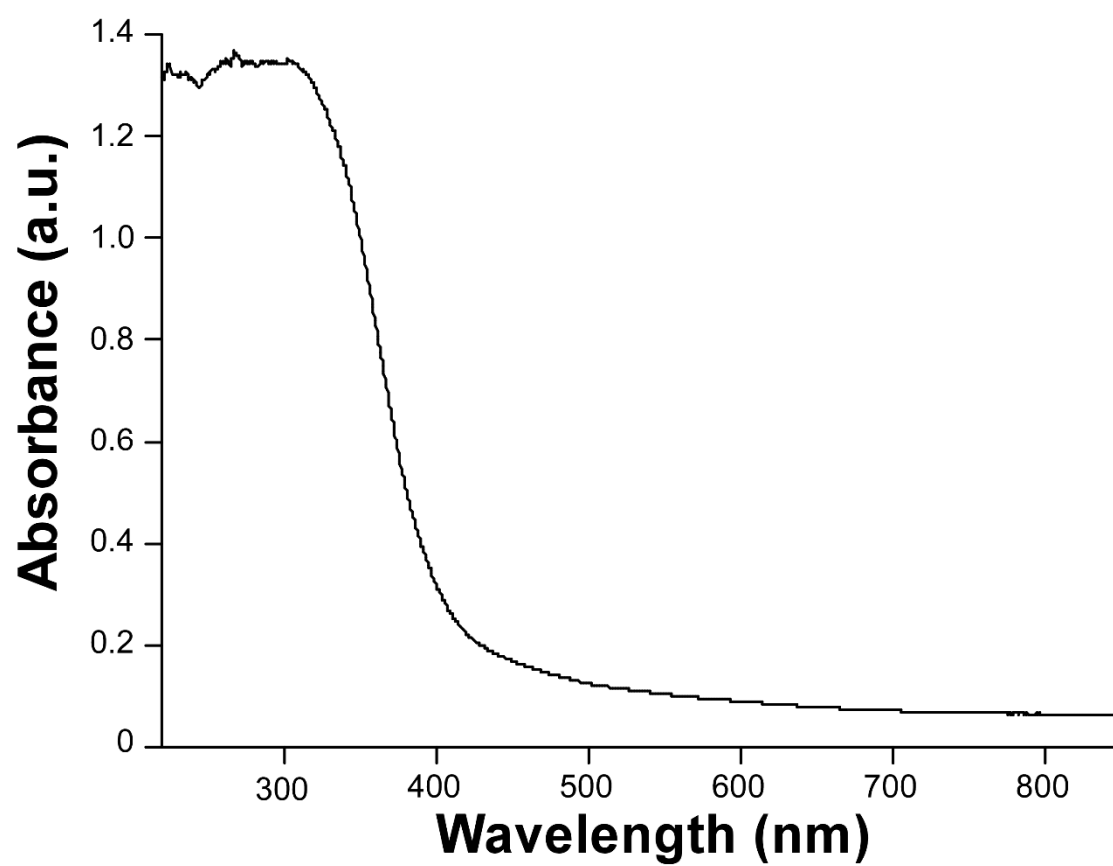

**Figure S14.** Diffuse reflectance spectrum acquired on a polycrystalline sample of compound **1**.
